# Supplementary material for: Dissociative reactions of [Au25(SR)18]− at copper oxide nanoparticles and formation of aggregated nanostructures
Source: Royal Society of Chemistry journal article supplement (doi:10.1039/d3nr00897e), 2023-01-01
Supplement: d3nr00897e2.pdf [file d3nr00897e2.pdf]

## Electronic Supplementary Information

### Dissociative reaction of $[\text{Au}_{25}(\text{SR})_{18}]^-$ at copper oxide nanoparticles and formation of aggregated nanostructures

Jayoti Roy,<sup>a</sup> Biswajit Mondal,<sup>a</sup> Gaurav Vishwakarma,<sup>a</sup> Nonappa,<sup>b</sup> Nishanthi Vasanthi Sridharan,<sup>a</sup> Pattabiraman Krishnamurthi,<sup>a</sup> Thalappil Pradeep\*<sup>a,c</sup>

<sup>a</sup>DST Unit of Nanoscience (DST UNS) & Thematic Unit of Excellence (TUE), Department of Chemistry, Indian Institute of Technology Madras, Chennai 600036, India.

<sup>b</sup>Faculty of Engineering and Natural Sciences, Tampere University, FI-33720 Tampere, Finland.

<sup>c</sup>International Centre for Clean Water, 2<sup>nd</sup> Floor, B-Block, IIT Madras Research Park, Kanagam Road, Taramani, Chennai 600113, India.

#### Table of contents

| Name    | Description                                                                                     | Page no. |
|---------|-------------------------------------------------------------------------------------------------|----------|
|         | Calculations of precursor concentration                                                         | S3       |
| Fig. S1 | UV-vis of NC after and before the reaction                                                      | S4       |
| Fig. S2 | ESI MS of $[\text{Au}_{25}]$                                                                    | S5       |
| Fig. S3 | HRTEM images of $[\text{Au}_{25}]$ and CuO NPs                                                  | S6       |
| Fig. S4 | ESI MS of NCs fragments and table of assigned chemical compositions                             | S7       |
| Fig. S5 | Evolution and ion abundances of $[\text{Au}_{24}\text{Cu}_1]$ and $[\text{Au}_{23}\text{Cu}_2]$ | S8       |
| Fig. S6 | High-resolution isotopic distributions of smaller NC fragments with their calculated ones       | S9       |
| Fig. S7 | Time-dependent ESI MS of reaction with reduced quantity of CuO NPs                              | S10      |
| Fig. S8 | TEM micrographs of bare CuO NPs after the reaction                                              | S10      |
| Fig. S9 | STEM micrographs of nano-assemblies and the EDS spectrum                                        | S11      |

|          |                                                                                      |          |
|----------|--------------------------------------------------------------------------------------|----------|
| Fig. S10 | STEM image and EDS elemental mapping of reacted NPs                                  | S11      |
| Fig. S11 | TEM micrographs of NSs                                                               | S12      |
| Fig. S12 | TEM photographs of NCs                                                               | S12      |
| Fig. S13 | EDS spectrum of supernatant containing NCs and isolated NSs                          | S13      |
| Fig. S14 | FT-IR analysis of [Au <sub>25</sub> ] NC, supernatant of the reaction, TOABr and PET | S13      |
| Fig. S15 | DLS study and TEM images of disassembly of NSs                                       | S14      |
| Fig. S16 | TEM images of completely disassembled NSs                                            | S15      |
| Video V1 | Tilt series of Fig. 3(C)                                                             | Attached |
| Video V2 | 3D construction of Fig. 3(D)                                                         | Attached |

## Calculation of number of particles/ml for:

### a) [Au<sub>25</sub>(PET)<sub>18</sub>]<sup>-</sup> cluster

$$\text{Molecular weight} = 7391$$

$$\text{Mass of 1 [Au}_{25}\text{] NC (m)} = \frac{7391 \times 10^3}{6.023 \times 10^{23}} \text{ mg} = 1.227 \times 10^{-17} \text{ mg}$$

$$\text{Mass of [Au}_{25}\text{] NC in 1 ml of stock solution considered in the experiments (W)} = \frac{1 \text{ mg}}{100 \text{ ml}}$$

$$\begin{aligned} \text{No of [Au}_{25}\text{] NC in 1 ml of stock solution/1ml} &= (W/m) \\ &= \left( \frac{0.01}{1.227 \times 10^{-17}} \right) \text{ No/ml} \\ &= (8.15 \times 10^{15}) \text{ No/ml} \end{aligned}$$

$$\begin{aligned} \text{Molarity of NCs in the stock solution} &= \left( \frac{N}{N_A} \right) \\ &= \frac{8.15 \times 10^{15}}{6.023 \times 10^{23}} \text{ M} \\ &= 1.35 \text{ nM} \end{aligned}$$

Amount of stock solution was used during reaction – 25  $\mu\text{L}$ .

### b) CuO nanoparticles

$$\text{Average size of CuO NPs (HRTEM)} = 2R = 50 \text{ nm}$$

$$\begin{aligned} \text{Volume of 1 CuO NP (sphere), V} &= \left( \frac{4}{3} \right) \pi R^3 \text{ nm}^3 \\ &= 65416.6 \text{ nm}^3 \end{aligned}$$

$$\begin{aligned} \text{Density of CuO NP, } \rho &= 6.31 \text{ g/cm}^3 \\ &= (0.631 \times 10^{-17}) \text{ mg/nm}^3 \end{aligned}$$

$$\begin{aligned} \text{Mass of 1 CuO NP, m} &= V \cdot \rho \\ &= (65416.6 \times 0.631 \times 10^{-17}) \text{ mg} \\ &= 4.13 \times 10^{-13} \text{ mg} \end{aligned}$$

Weight of CuO NPs (dry weight of the sample), W = 1.6 mg/ml

$$\begin{aligned} \text{No of NPs in the solution, N} &= \left( \frac{W}{m} \right) \\ &= 4.019 \times 10^{12} \text{ number/ml} \end{aligned}$$

$$\begin{aligned} \text{Molarity of the CuO NPs in solution} &= \left( \frac{N}{N_A} \right) \\ &= 6.67 \times 10^{-3} \text{ nM} \end{aligned}$$

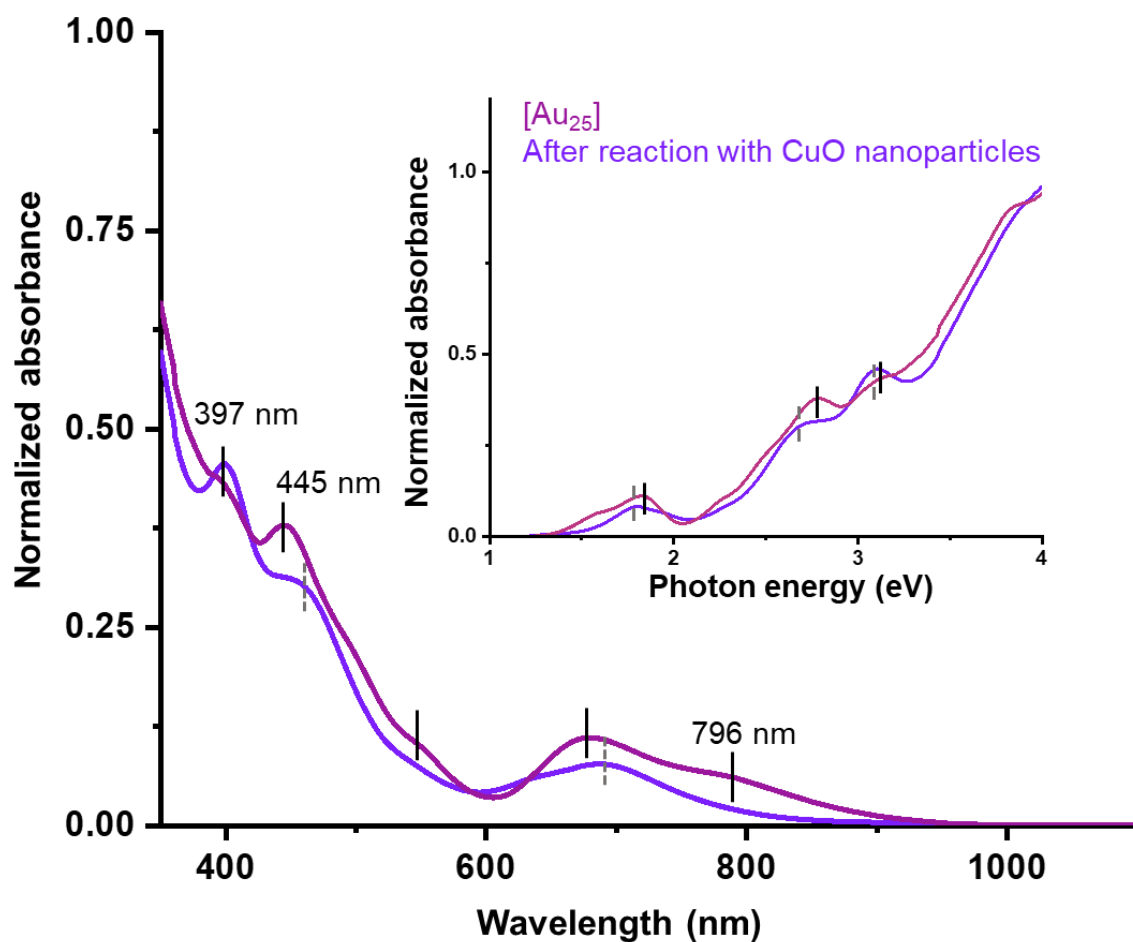

**Fig. S1** UV-vis spectra of [Au<sub>25</sub>] before and after the reaction. Inset shows the absorption spectra in terms of photon energy (eV) of [Au<sub>25</sub>] before and after of the reaction.

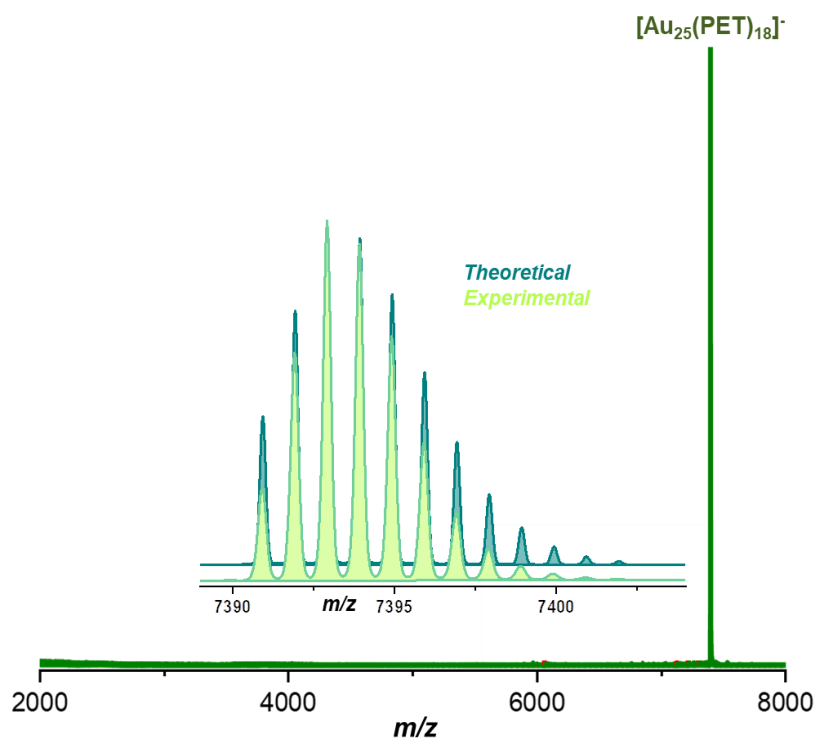

**Fig. S2** ESI MS of  $[\text{Au}_{25}]$  in DCM in the negative mode. The overlay plot of the experimental (light green) and calculated (dark green) isotopic distributions of  $[\text{Au}_{25}]$ .

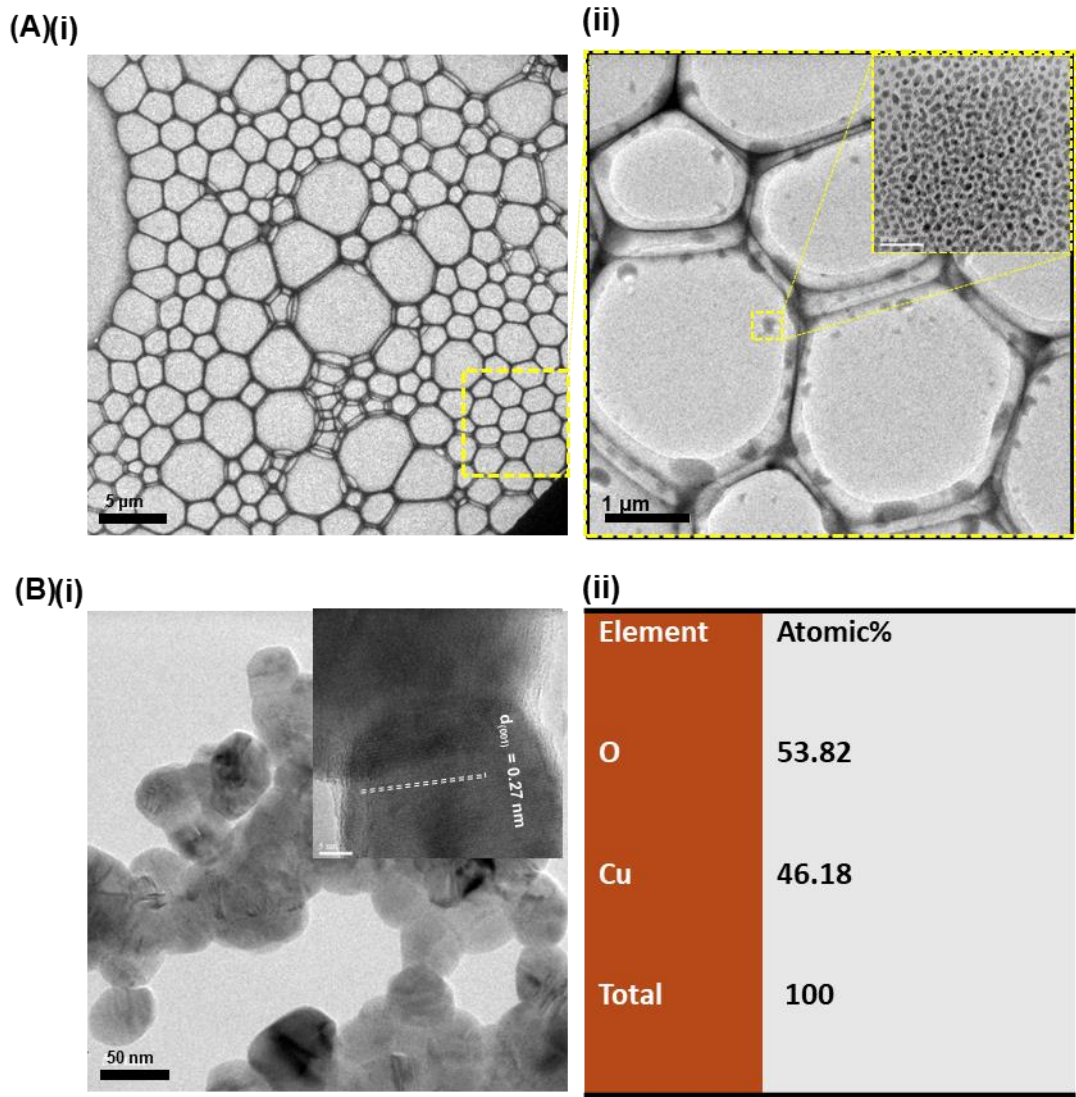

**Fig. S3** (A(i-ii)) TEM micrographs of drop casted [Au<sub>25</sub>] NC. In inset of (A(ii)) shows the discrete NCs (slight beam-induced aggregation and damage are also observed). (B(i)) TEM image of bare parent CuO NPs. Inset shows the lattice spacing of crystalline NPs. (B(ii)) EDS elemental compositions of parent NPs.

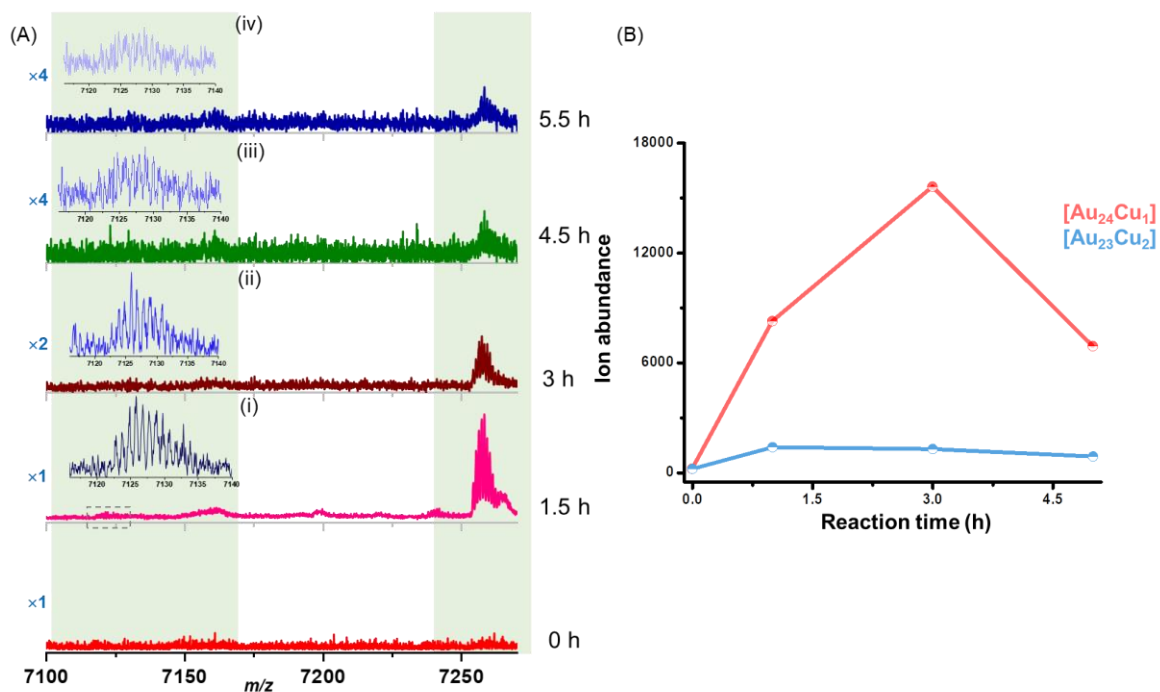

**Fig. S4** ESI MS spectra (A) of the evolution of  $[\text{Au}_{24}\text{Cu}_1]$  and  $[\text{Au}_{23}\text{Cu}_2]$  NCs during the reaction and their ion abundance plot (B) as a function of reaction time.

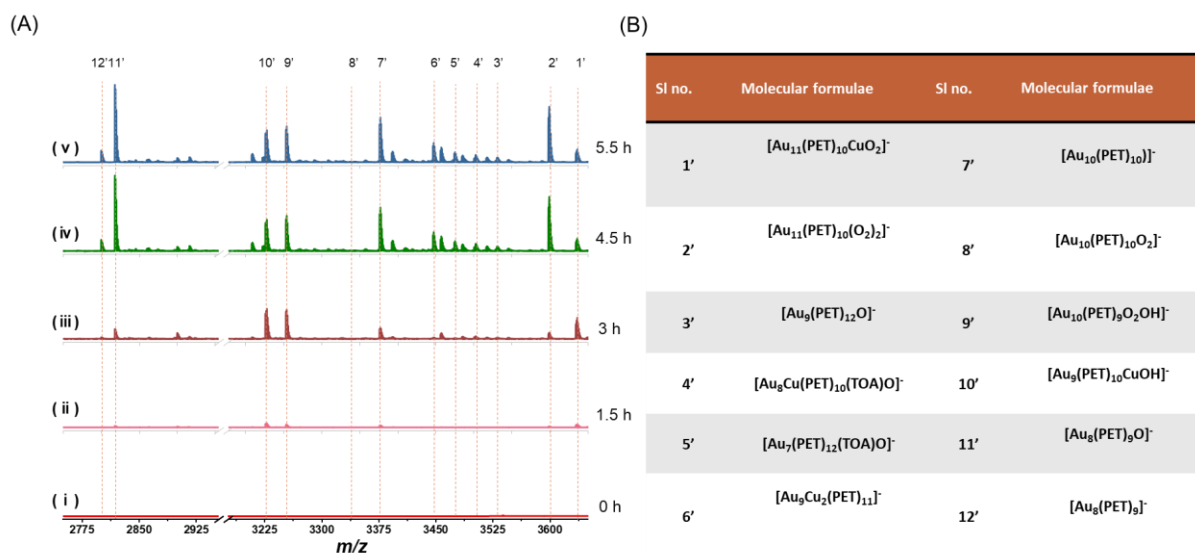

**Fig. S5** ESI MS of smaller NCs fragments generated with time and (B) table of chemical compositions of the fragments.



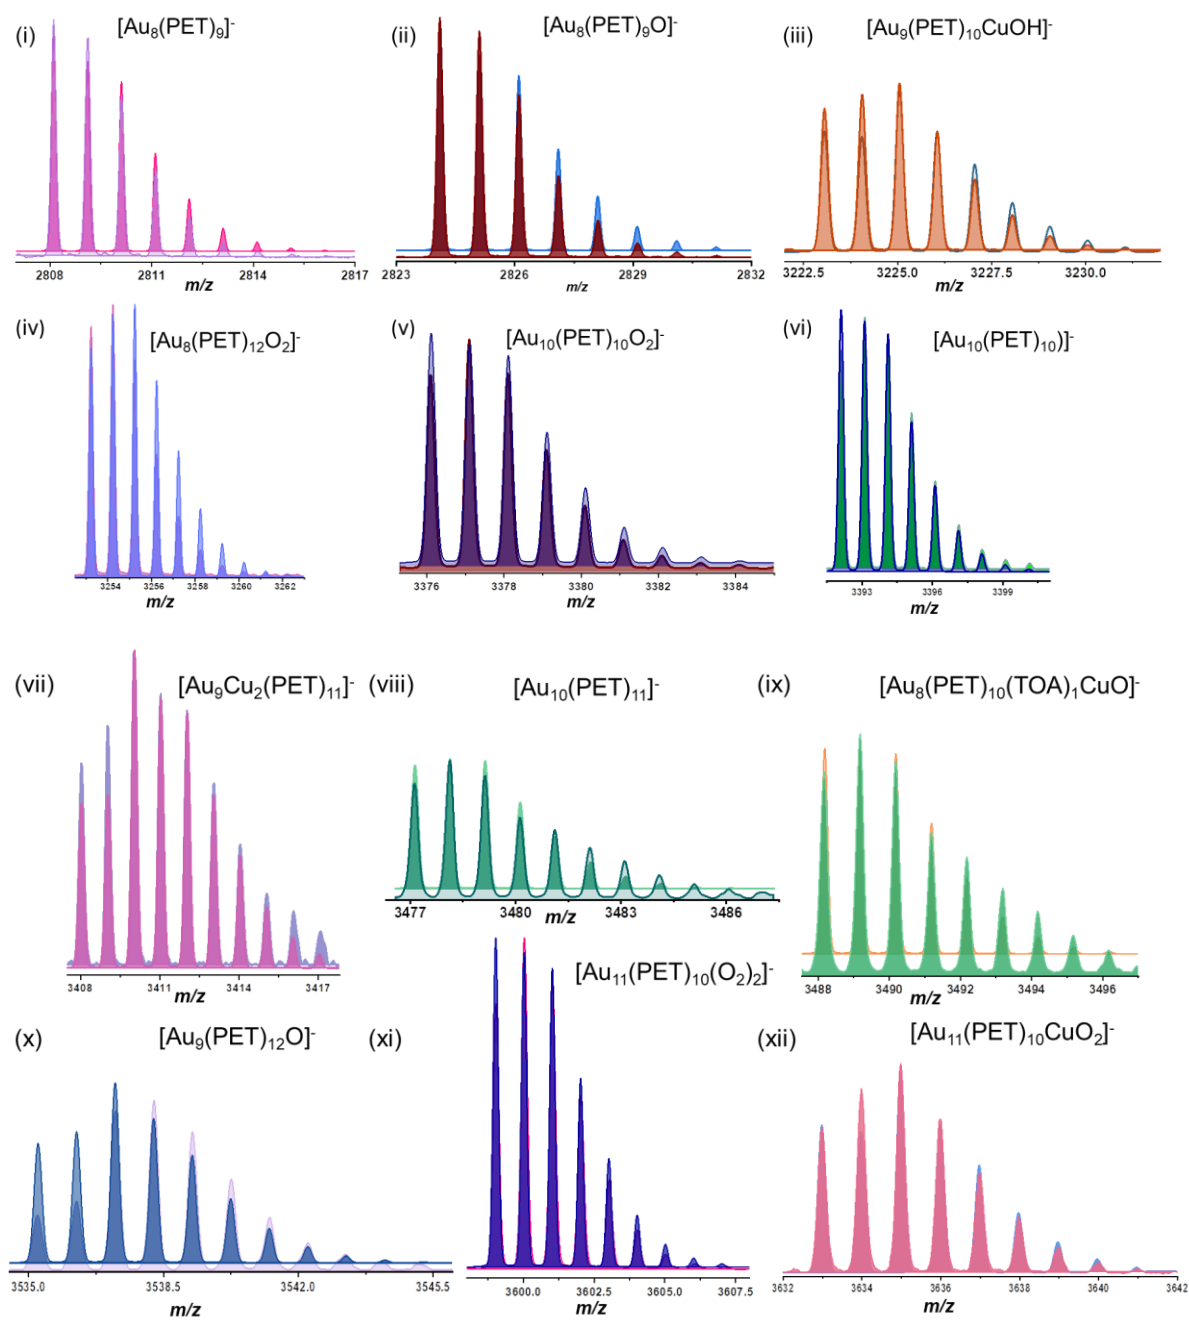

**Fig. S6** Experimental high-resolution isotopic distribution of smaller NC fragments with their calculated isotopic distributions.

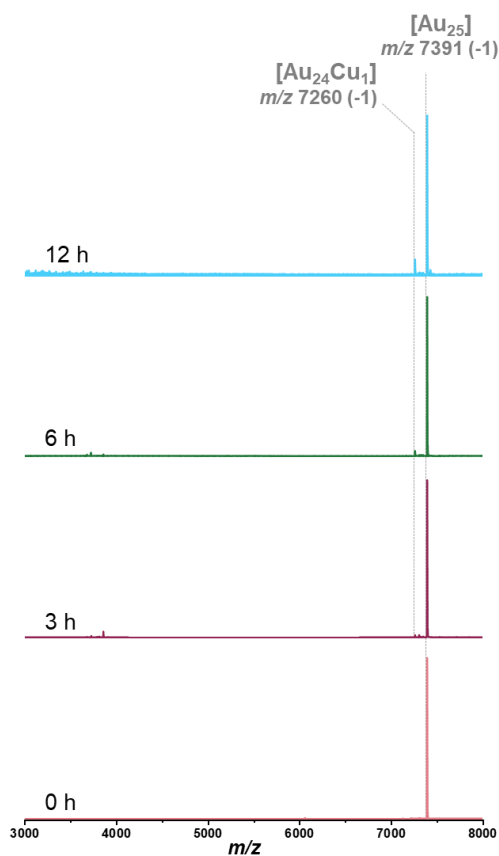

**Fig. S7** Time-dependent ESI MS of reaction between  $[Au_{25}]$  and very diluted CuO NPs solutions.

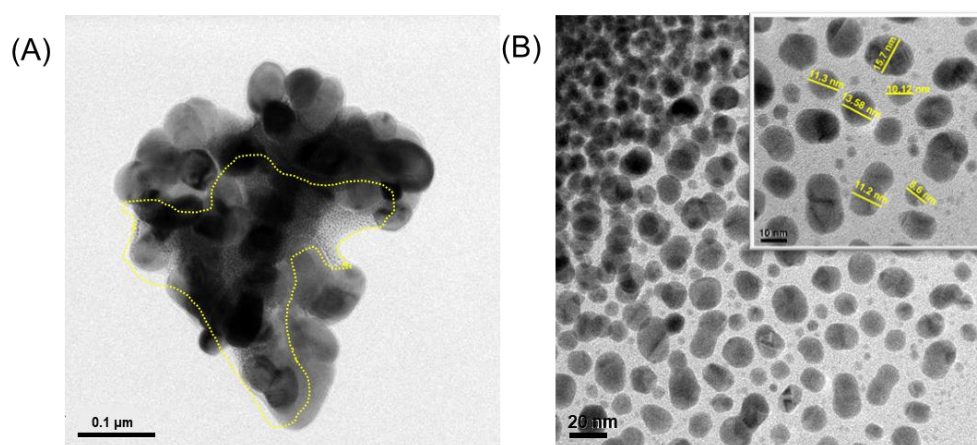

**Fig. S8** TEM micrographs show bare CuO NPs after the reaction. In (A) and (B), the bare NPs are intermingled with NC (area under dotted line), and smaller size bare NPs are shown, respectively.

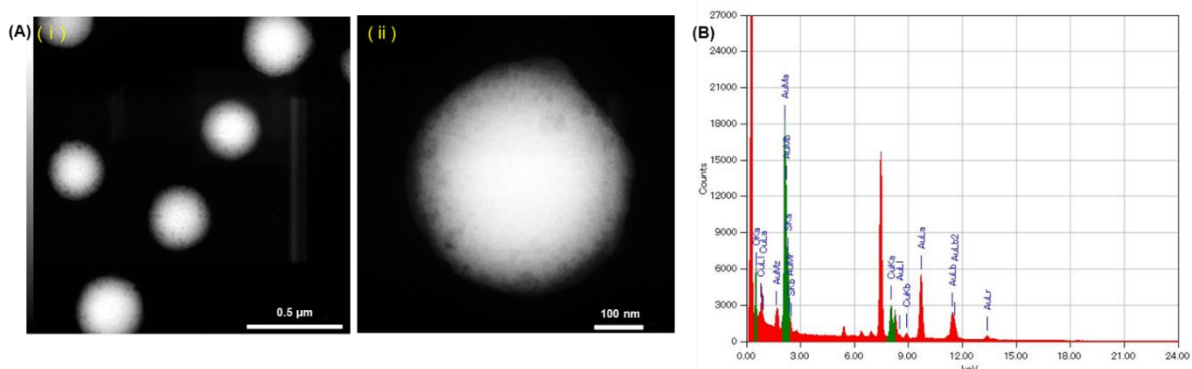

**Fig. S9** (A(i-ii)) STEM micrographs of nano-assemblies and (B) EDS spectrum collected from (A(ii)) Showing the elemental compositions.

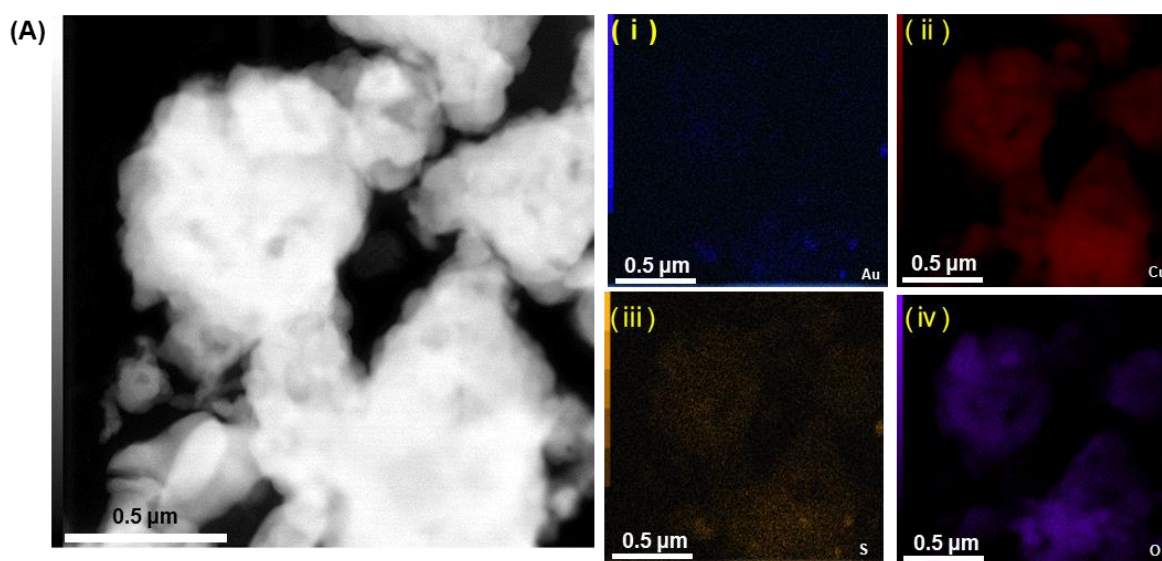

**Fig. S10** (A) STEM image and EDS elemental mapping of NPs after the reaction.

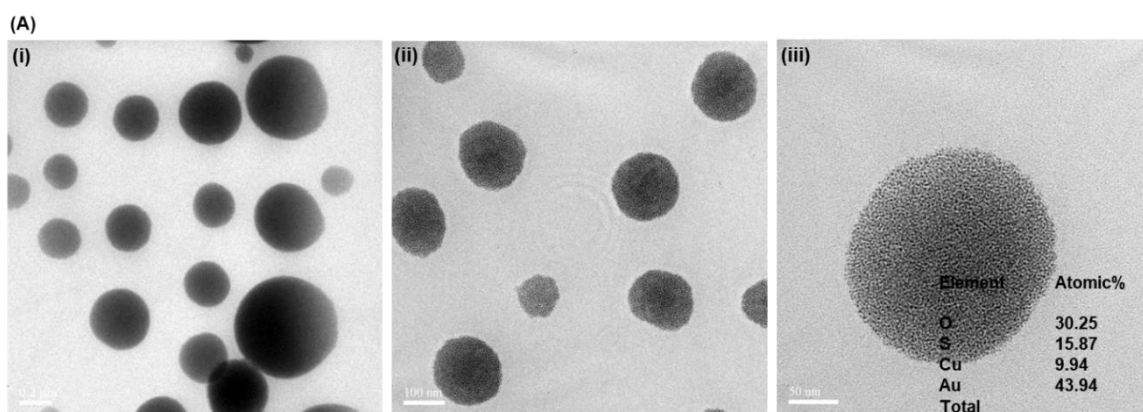

**Fig. S11** TEM micrographs of NCs present in the supernatant and respective elemental compositions (in inset).

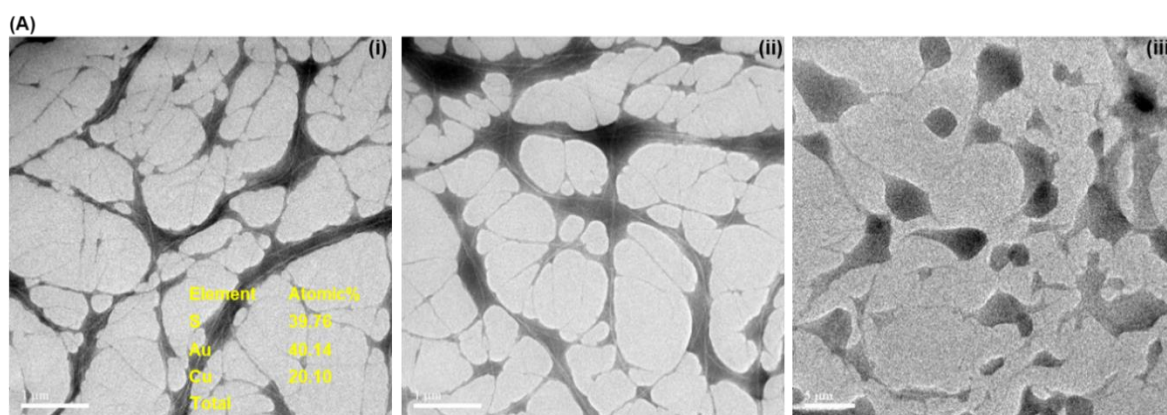

**Fig. S12** TEM photographs of NCs present in the supernatant and respective elemental composition (in inset of (i)).

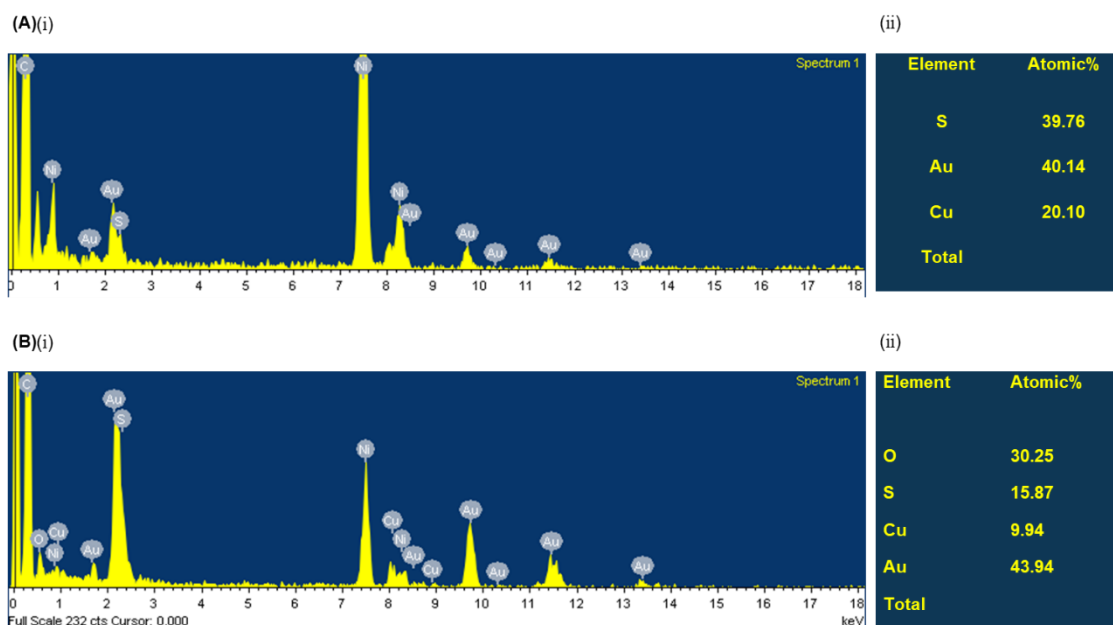

**Fig. S13** Elemental compositions from EDS spectrum of – (A(i-ii)) supernatant containing NCs, and (B(i-ii)) isolated NSs. The Ni signal is coming from the grid (carbon coated Ni grid is used for the imaging).

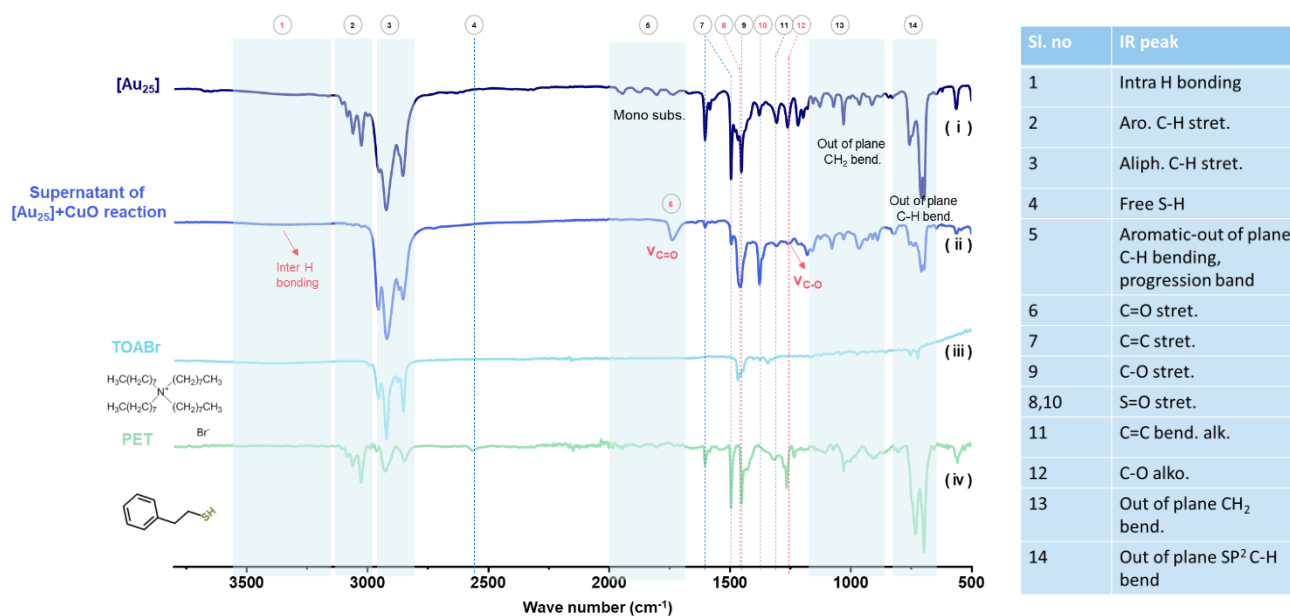

**Fig. S14** FTIR analysis of (i) [Au<sub>25</sub>] NC, (ii) supernatant of the reaction, (iii) TOABr and (iv) PET (frequencies marked with red indicate new peaks appeared due to the reaction).

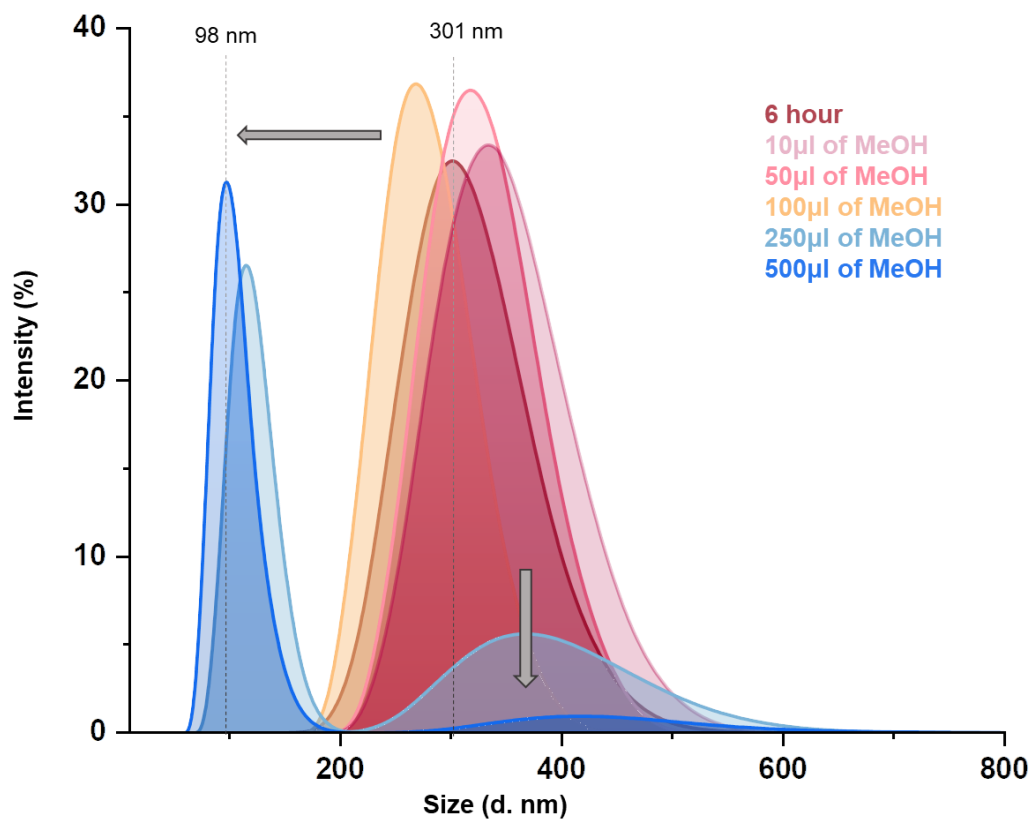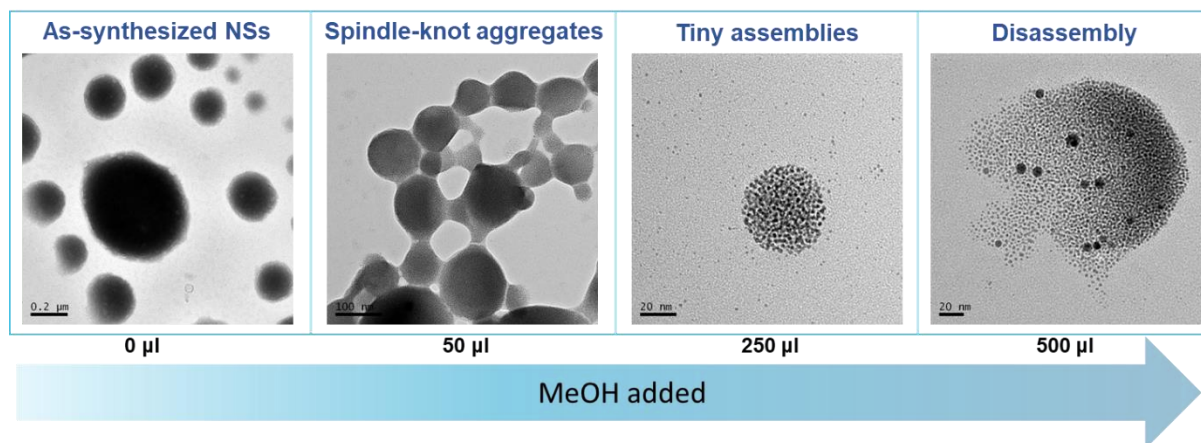

**Fig. S15** DLS study and TEM images showing gradual disassembly, from NSs to smaller aggregates.

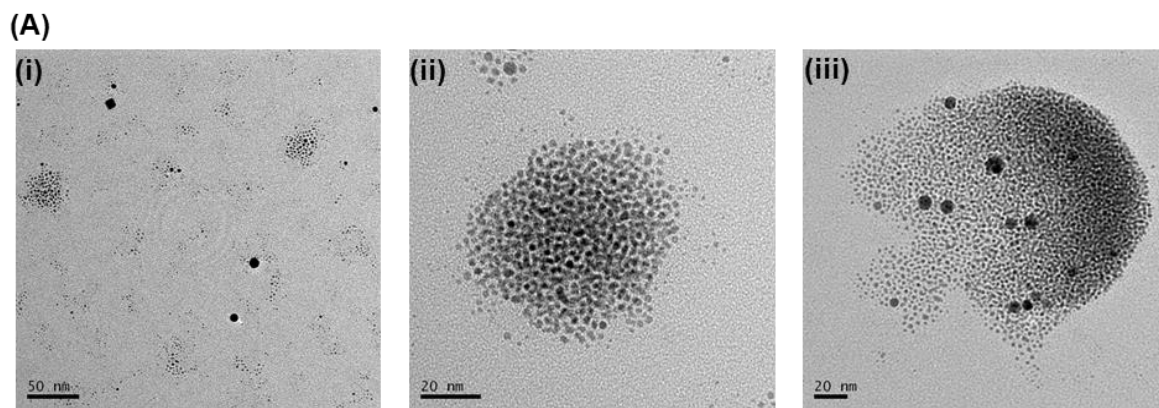

**Fig. S16** TEM images of disassembled NSs after addition of 500  $\mu$ l of MeOH.
